# Supplementary material for: High-temperature ferromagnetism in Co-doped CeO2 synthesized by the coprecipitation technique
Source: Royal Society of Chemistry journal article supplement (doi:10.1039/c2cp23973f), 2012-01-01
Supplement: c2cp23973f.pdf [file c2cp23973f.pdf]

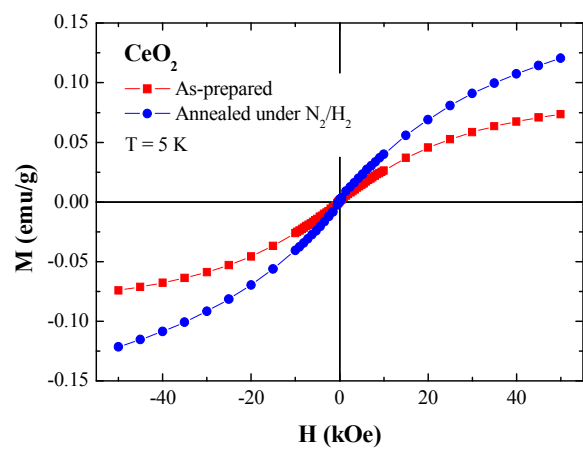

Magnetization curves recorded at 5 K of CeO<sub>2</sub> as-prepared and annealed under N<sub>2</sub>/H<sub>2</sub>.
